# Supplementary material
Source: PubMed Central journal article supplement (PMC10603015)
Supplement: 12264_2023_1055_MOESM1_ESM.pdf [file 12264_2023_1055_MOESM1_ESM.pdf]

# Supplementary Materials

## Supplementary Figures and Figure Legends

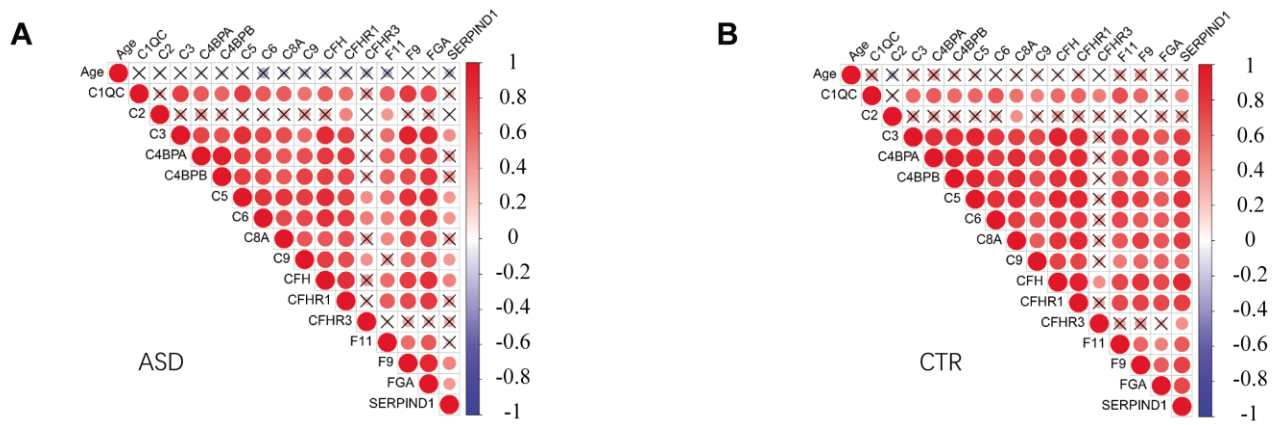

**Fig. S1** The correlation between DEPs and age in the ASD group (A) and in the control group (B).

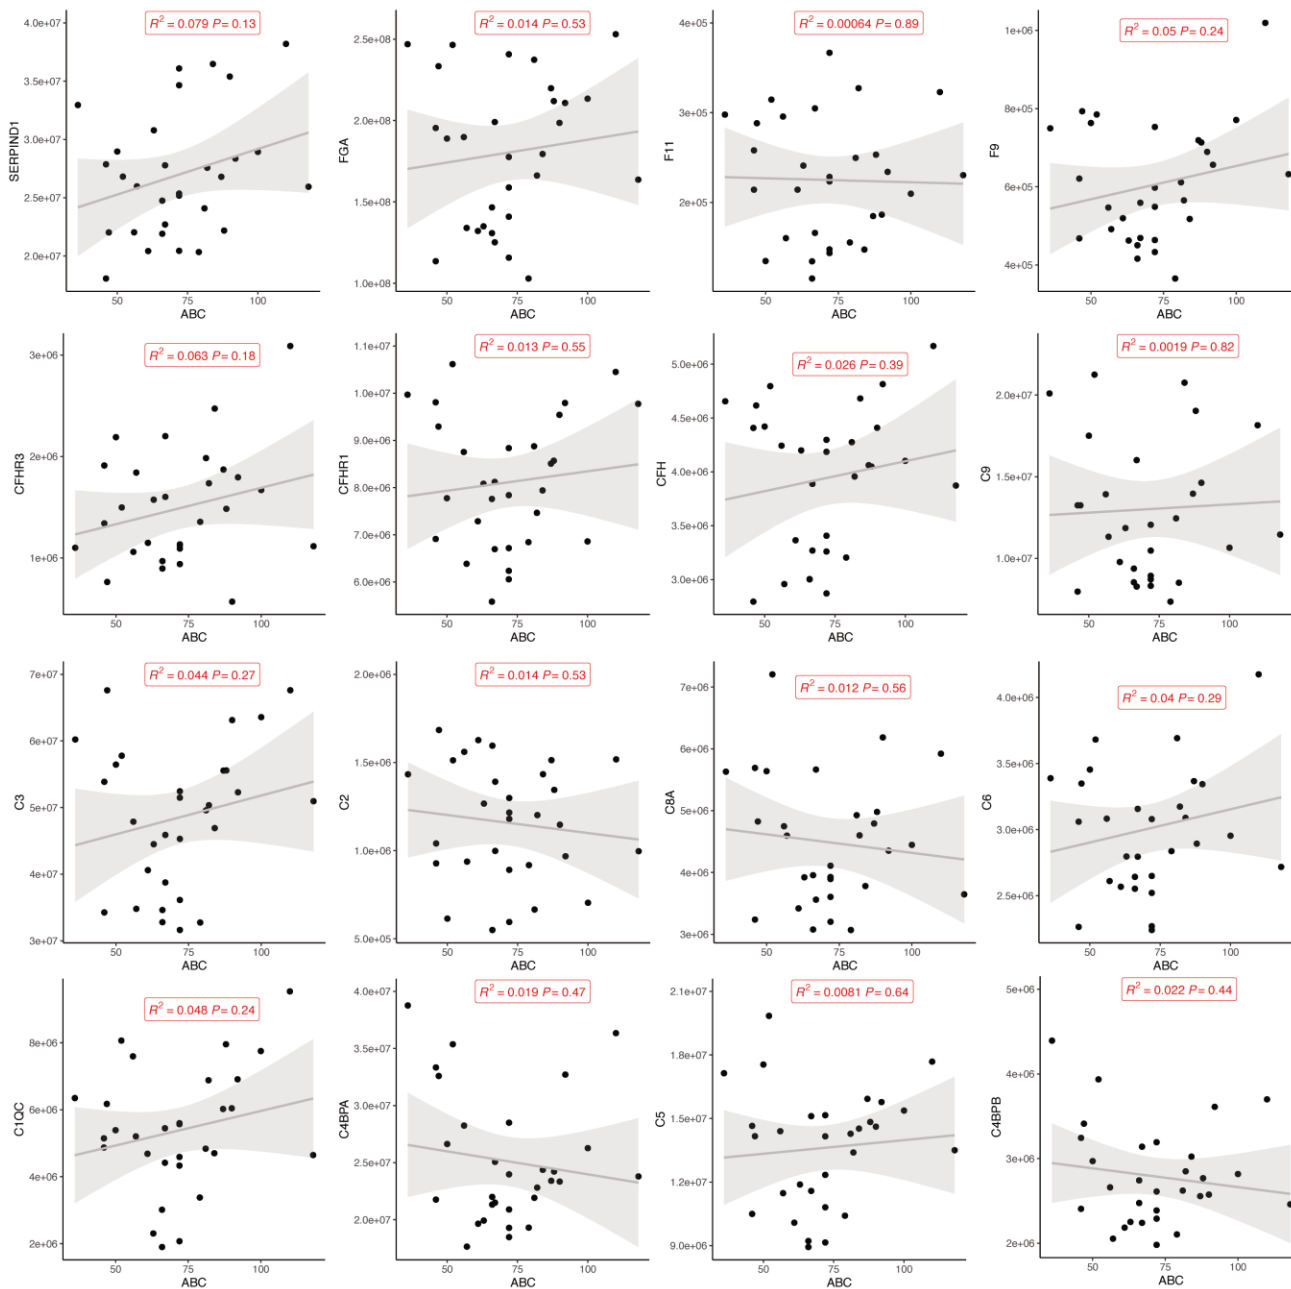

**Fig. S2** The correlation between DEPs and ABC diagnostic scores. The y-axis represents the corresponding strength of the mass spectrum.

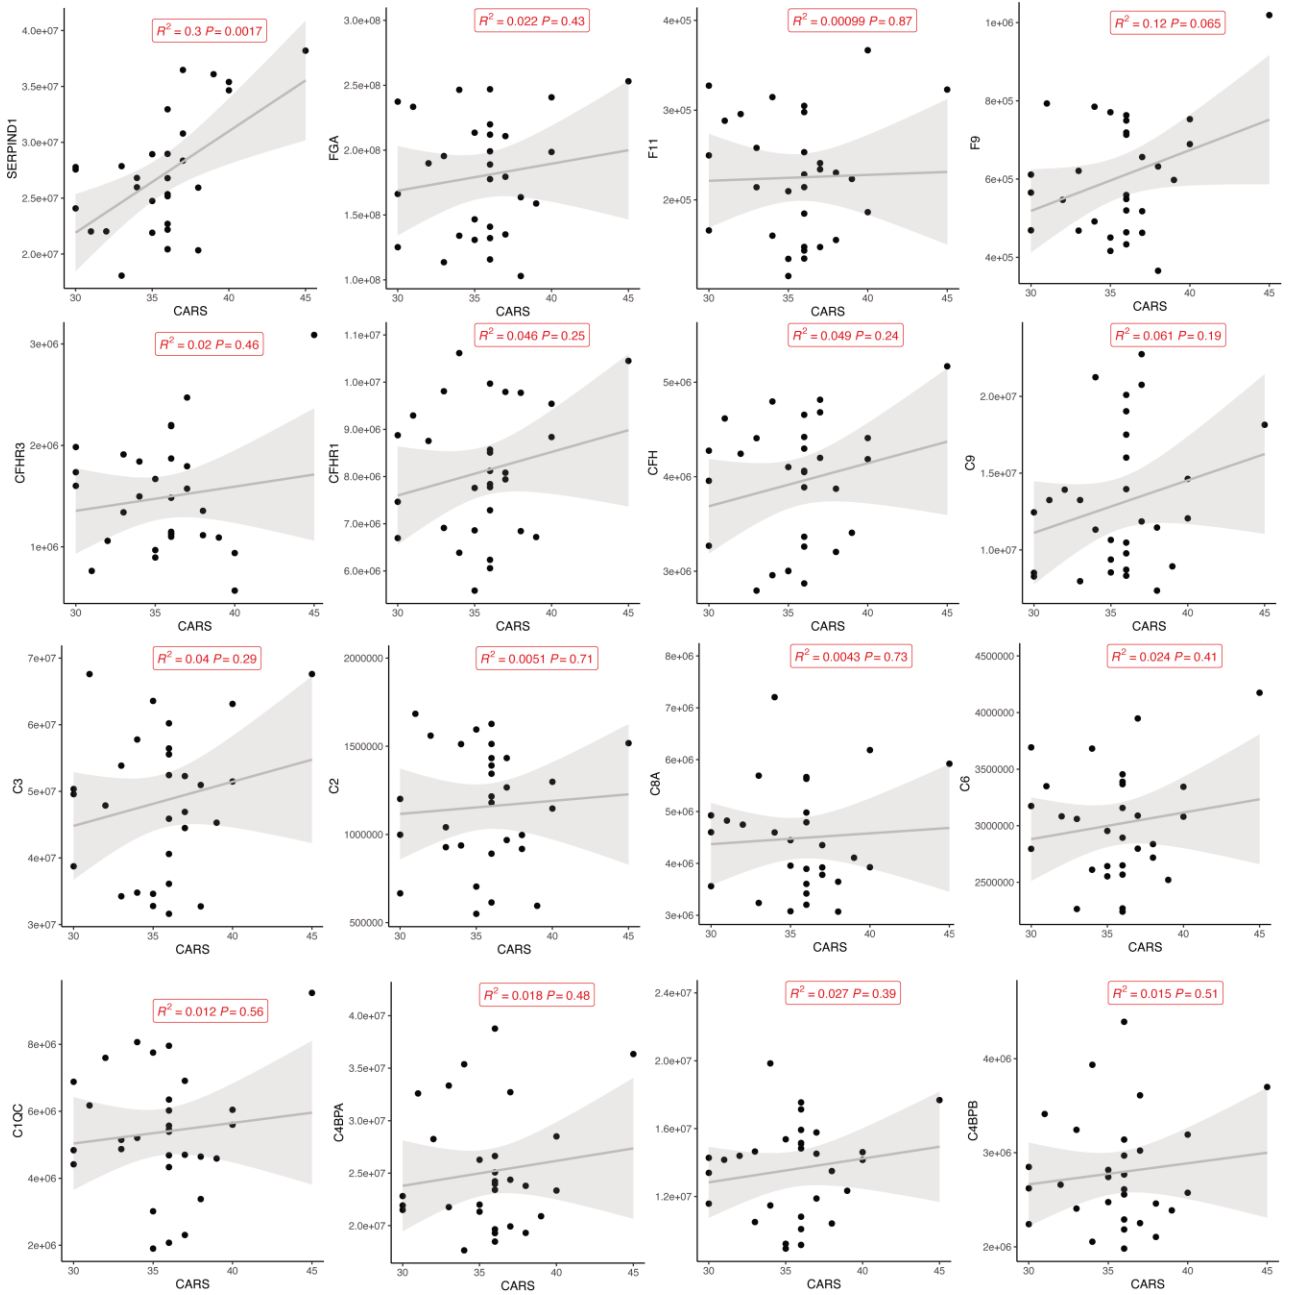

**Fig S3** The correlation between DEPs and CARS diagnostic scores. The y-axis represents the corresponding strength of the mass spectrum.

## Supplementary Tables

**Table S1** The information on ASD patients and healthy controls.

|                 | ASD                       | CTR                       | <i>t</i> -test<br>( <i>P</i> -value) |
|-----------------|---------------------------|---------------------------|--------------------------------------|
| Samples         | 30 (24 male and 6 female) | 30 (24 male and 6 female) | –                                    |
| Age<br>(months) | 38.67 ± 14.10             | 36.63 ± 10.32             | 0.5264                               |
| BMI             | 15.06 ± 1.87              | 15.18 ± 1.20              | 0.7557                               |
| CARS            | 35.5 ± 3.5                | –                         | –                                    |
| ABC             | 71.6 ± 21.3               | –                         | –                                    |

**Table S2** List of proteins and their specific peptides related to the complement and coagulation pathways through DDA library database and website matching.

See the Excel file.

**Table S3** Complement and coagulation pathway protein qualitative information sheet.

| No. | Uniprot ID | Protein name                    | Gene name    |
|-----|------------|---------------------------------|--------------|
| 1   | P04003     | C4b-binding protein alpha chain | <i>C4BPA</i> |
| 2   | P20851     | C4b-binding protein beta chain  | <i>C4BPB</i> |

|    |        |                                          |              |
|----|--------|------------------------------------------|--------------|
| 3  | P10909 | Clusterin                                | <i>CLU</i>   |
| 4  | P00740 | Coagulation factor IX                    | <i>F9</i>    |
| 5  | P00742 | Coagulation factor X                     | <i>F10</i>   |
| 6  | P03951 | Coagulation factor XI                    | <i>F11</i>   |
| 7  | P00748 | Coagulation factor XII                   | <i>F12</i>   |
| 8  | P00488 | Coagulation factor XIII A chain          | <i>F13A1</i> |
| 9  | P05160 | Coagulation factor XIII B chain          | <i>F13B</i>  |
| 10 | P02745 | Complement C1q subcomponent subunit A    | <i>C1QA</i>  |
| 11 | P02747 | Complement C1q subcomponent subunit C    | <i>C1QC</i>  |
| 12 | Q9NZP8 | Complement C1r subcomponent-like protein | <i>C1RL</i>  |
| 13 | P09871 | Complement C1s subcomponent              | <i>C1S</i>   |
| 14 | P0C0L4 | Complement C4-A                          | <i>C4A</i>   |
| 15 | P06681 | Complement component C2                  | <i>C2</i>    |
| 16 | P01024 | Complement component C3                  | <i>C3</i>    |
| 17 | P01031 | Complement component C5                  | <i>C5</i>    |
| 18 | P13671 | Complement component C6                  | <i>C6</i>    |
| 19 | P10643 | Complement component C7                  | <i>C7</i>    |
| 20 | P07357 | Complement component C8 alpha chain      | <i>C8A</i>   |
| 21 | P07358 | Complement component C8 beta chain       | <i>C8B</i>   |
| 22 | P07360 | Complement component C8 gamma chain      | <i>C8G</i>   |
| 23 | P02748 | Complement component C9                  | <i>C9</i>    |
| 24 | P00746 | Complement factor D                      | <i>CFD</i>   |
| 25 | P08603 | Complement factor H                      | <i>CFH</i>   |
| 26 | Q03591 | Complement factor H-related protein 1    | <i>CFHR1</i> |
| 27 | Q02985 | Complement factor H-related protein 3    | <i>CFHR3</i> |

|    |        |                                  |                 |
|----|--------|----------------------------------|-----------------|
| 28 | P20023 | Complement receptor type 2       | <i>CR2</i>      |
| 29 | P02671 | Fibrinogen alpha chain           | <i>FGA</i>      |
| 30 | P05546 | Heparin cofactor 2               | <i>SERPIND1</i> |
| 31 | P11226 | Mannose-binding protein C        | <i>MBL2</i>     |
| 32 | P05154 | Plasma serine protease inhibitor | <i>SERPINA5</i> |
| 33 | P00747 | Plasminogen                      | <i>PLG</i>      |

---

**Table S4** Quantitative analysis list of 33 complement and coagulation pathway-related proteins (corresponding intensity of MRM analysis).

**See the Excel file.**

**Table S5** The pathways in which DEPs are involved, based on GO analysis by OMICSBEAN.

**See the Excel file.**
